# Supplementary material for: Bias and negative values of COVID-19 vaccine effectiveness estimates from a test-negative design without controlling for prior SARS-CoV-2 infection
Source: PubMed Central journal article supplement (PMC11579392; doi:10.1038/s41467-024-54404-w), 2024-11-20
Supplement: 41467_2024_54404_MOESM2_ESM.pdf [file 41467_2024_54404_MOESM2_ESM.pdf]

Supplementary Code 1: Code and README file for reproducing analyses in the manuscript.
